# Supplementary material for: Low Evidence for Tinnitus Risk Factors: A Systematic Review and Meta-analysis
Source: PubMed Central journal article supplement (PMC9971395; doi:10.1007/s10162-022-00874-y), 2022-11-15

**Supplementary Figure 1. Hearing loss (unspecified)**

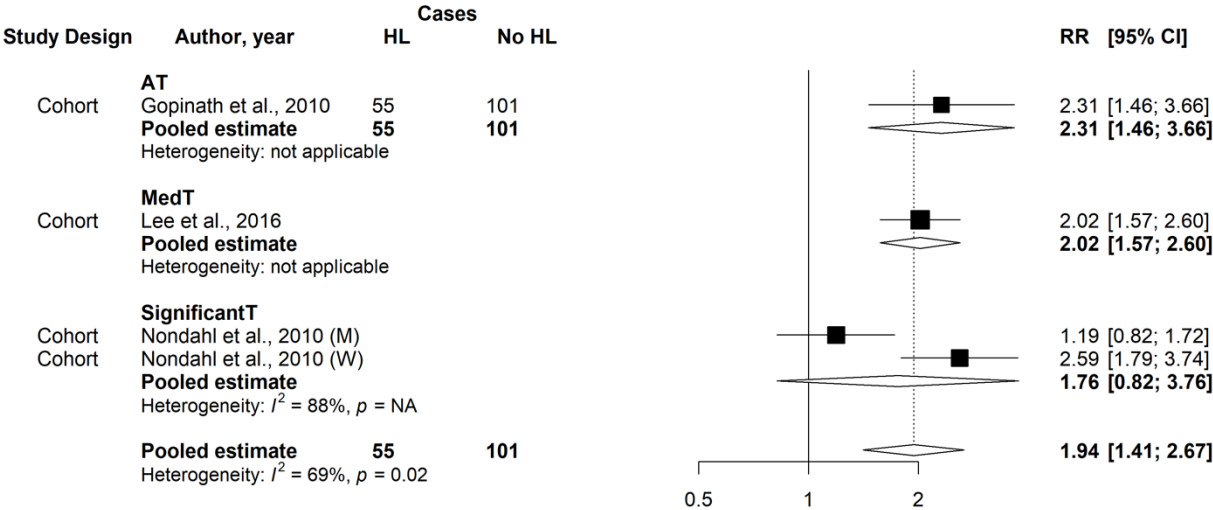

**Supplementary Figure 2. Sensorineural hearing loss**

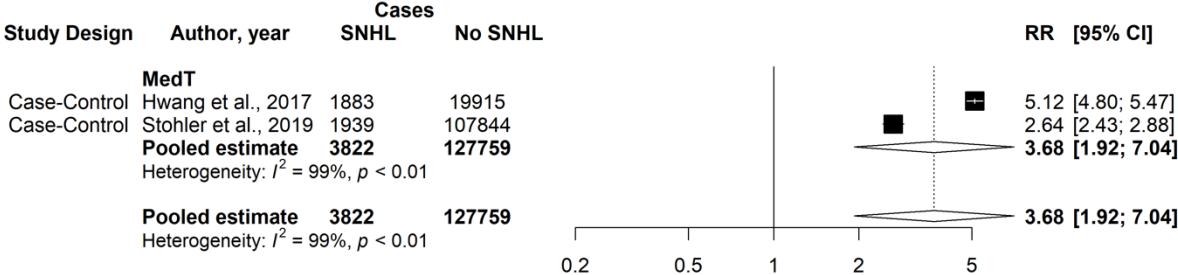

**Supplementary Figure 3. Noise exposure (occupational)**

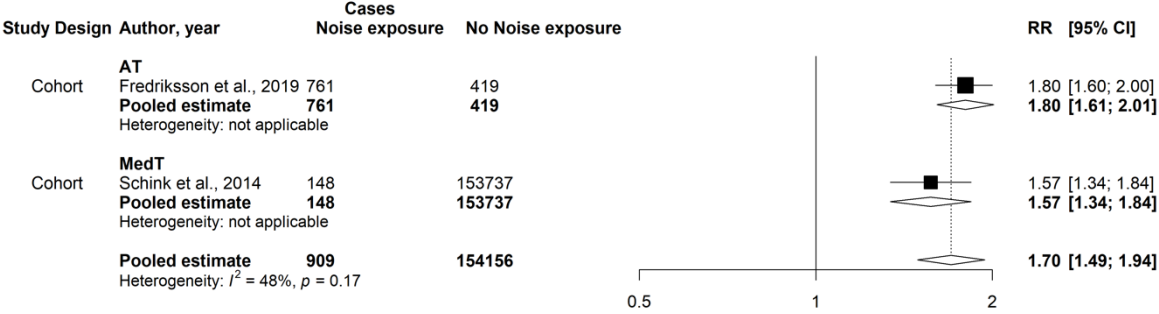

**Supplementary Figure 4. Otitis media**

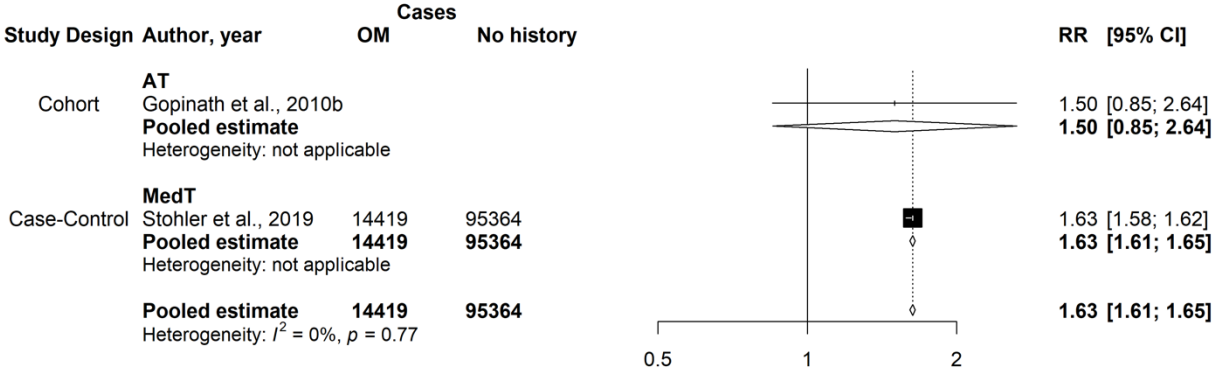

**Supplementary Figure 5. Platinum (ototoxic)**

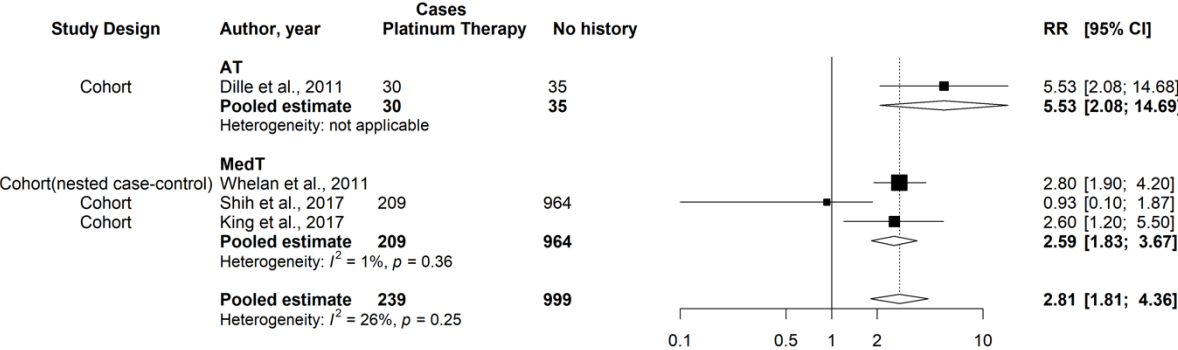

# Supplementary Figure 6. Noise exposure (leisure)

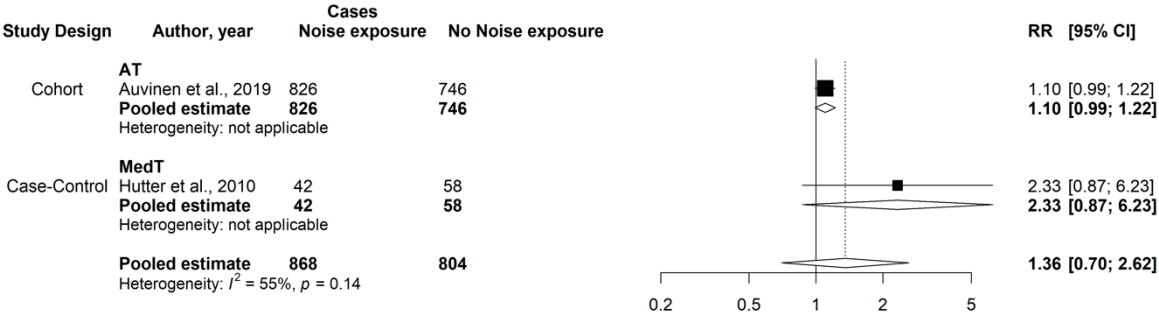

# Supplementary Figure 7. Alcohol consumption (high)

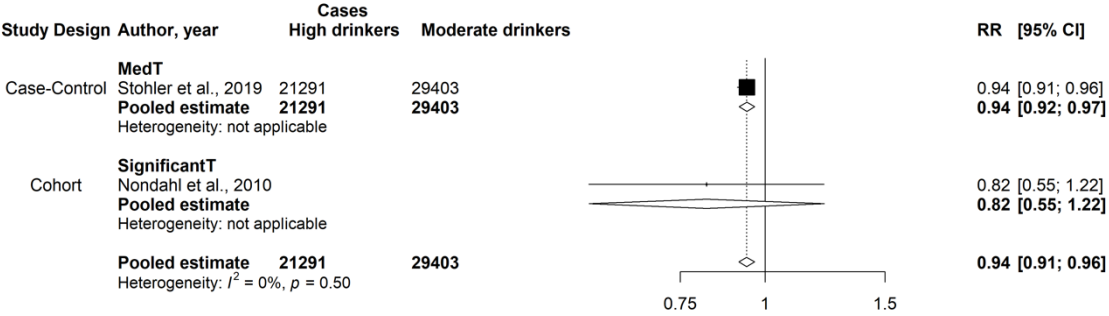

### Supplementary Figure 8. Alcohol consumption (low)

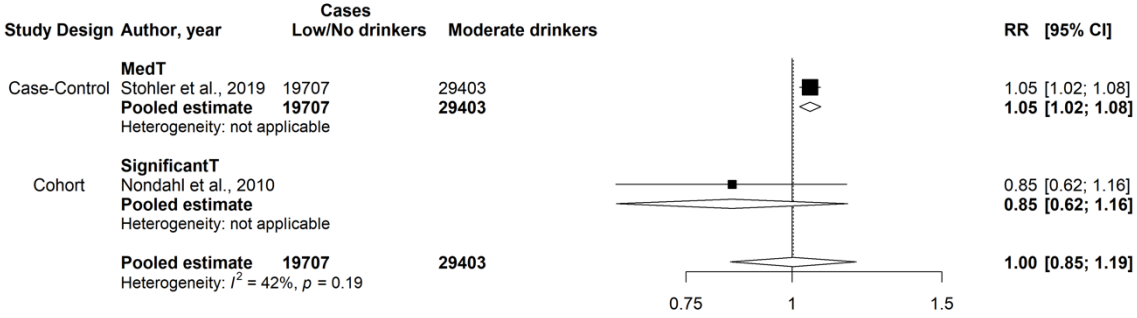



# Supplementary Figure 9. Smoking

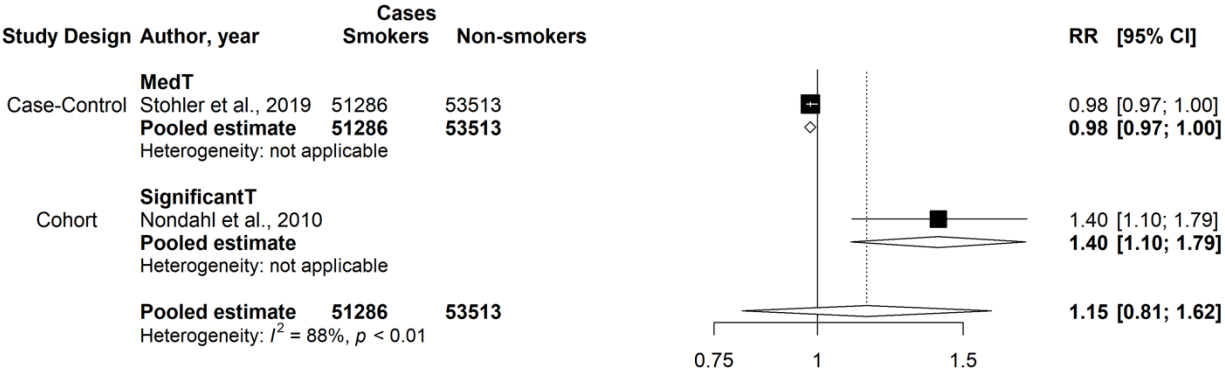

**Supplementary Figure 10. Sex/gender**

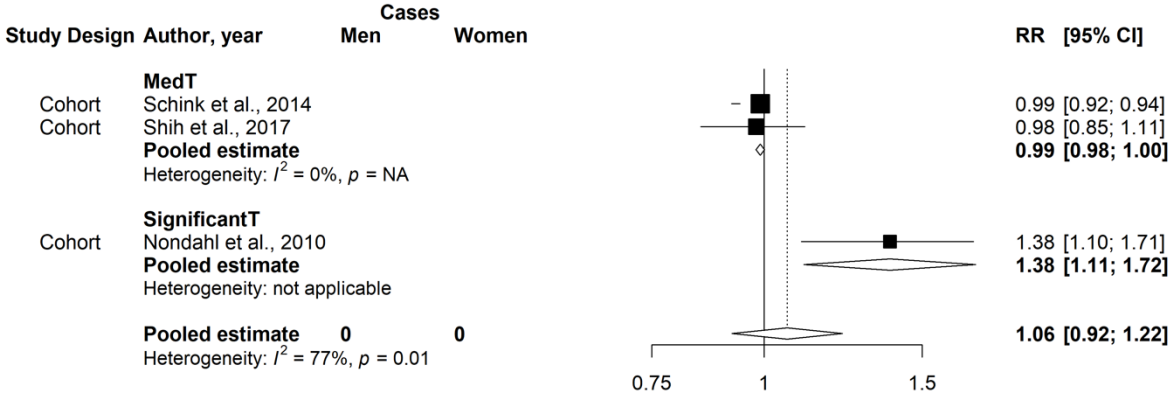

**Supplementary Figure 11. Orofacial musculo-skeletal – temporomandibular joint disorder**

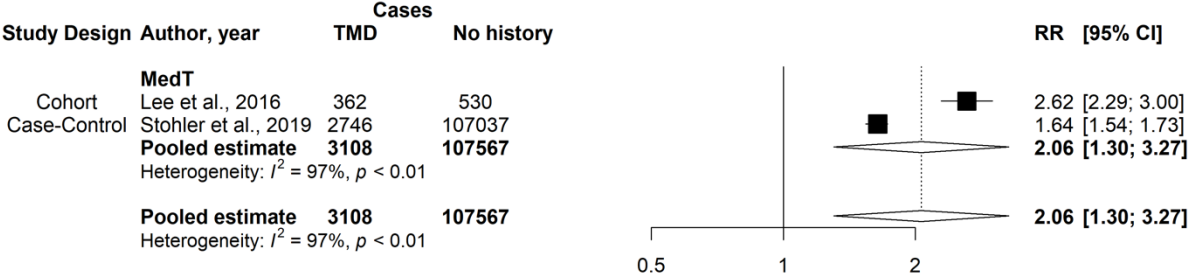

**Supplementary Figure 12. Mental health – depression**

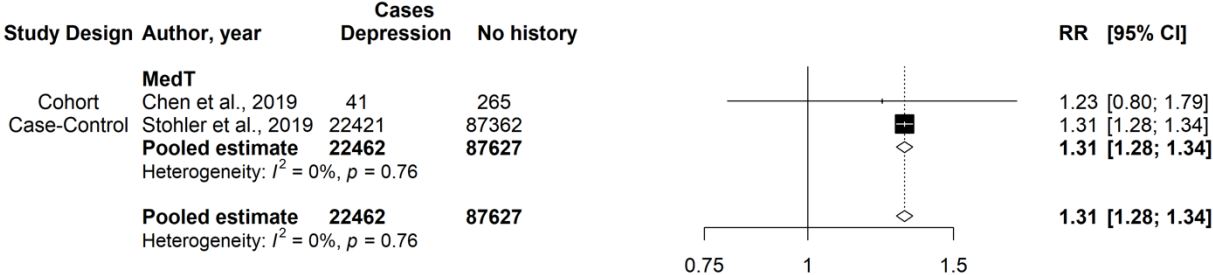

**Supplementary Figure 13. Endocrine and metabolic - diabetes**

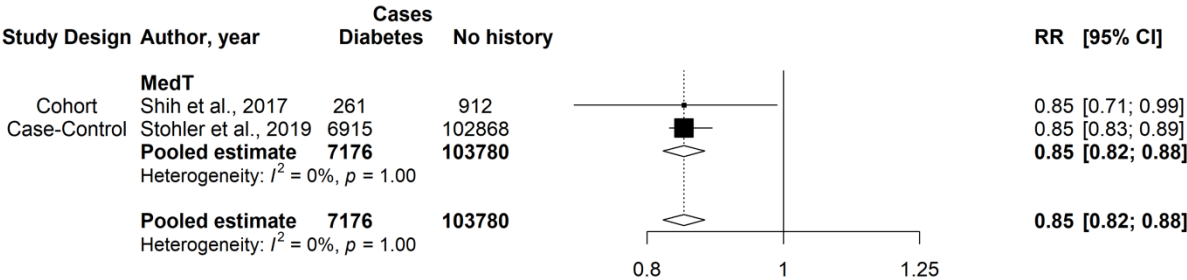

### Supplementary Figure 14. Noise exposure (leisure)

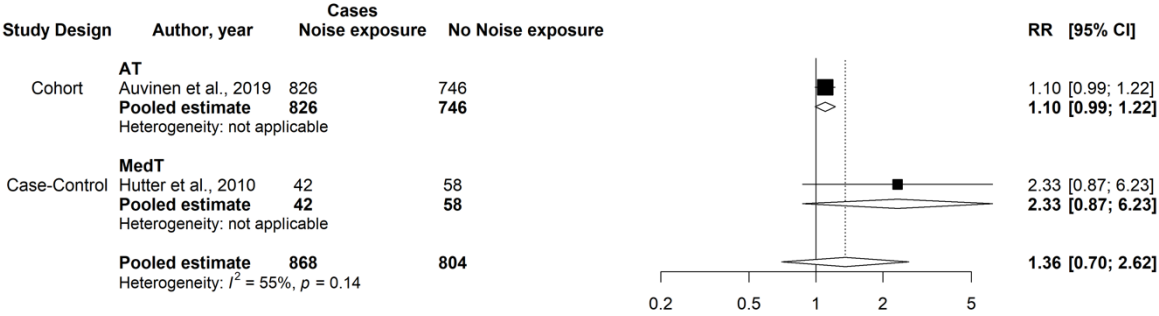

**Supplementary Figure 15. Body mass index**

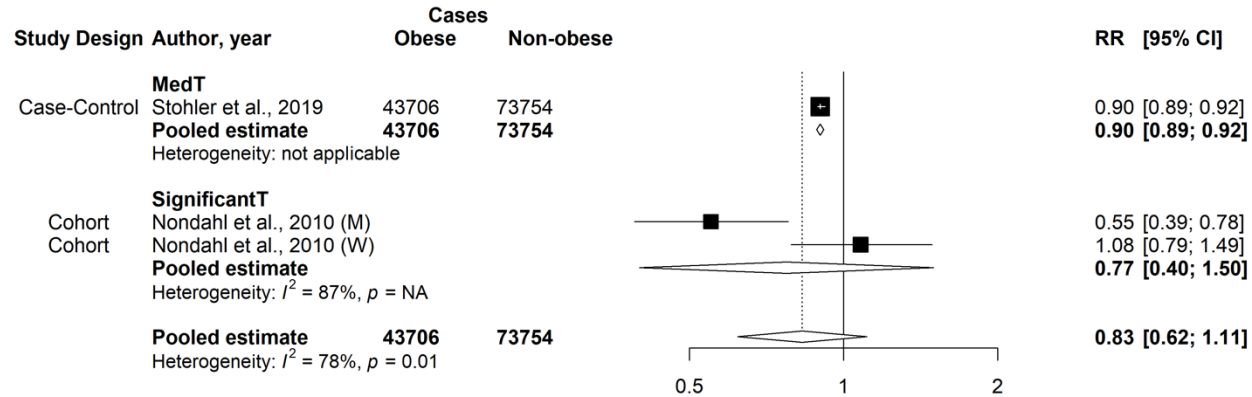

**Supplementary Figure 16. Cardiovascular – heart failure**

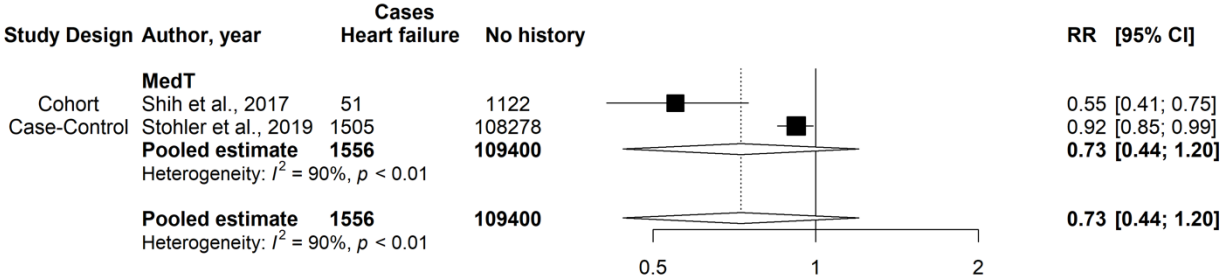



# Supplementary Figure 17. Cardiovascular – hypertension

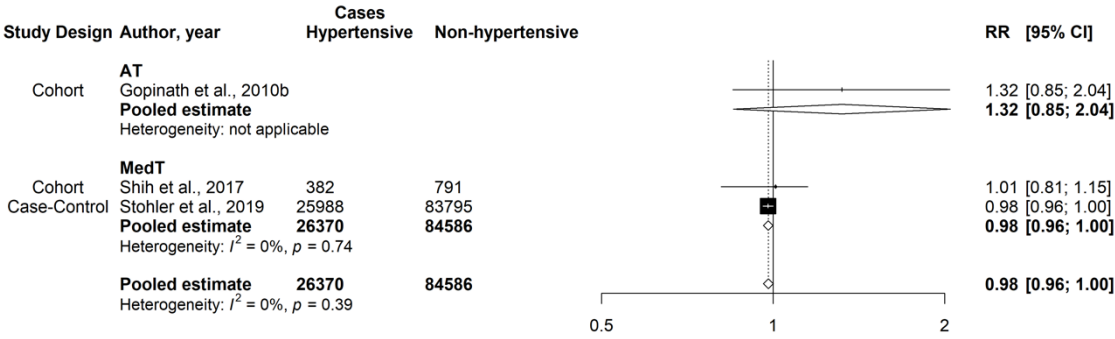

**Supplementary Figure 18. Cardiovascular – stroke**

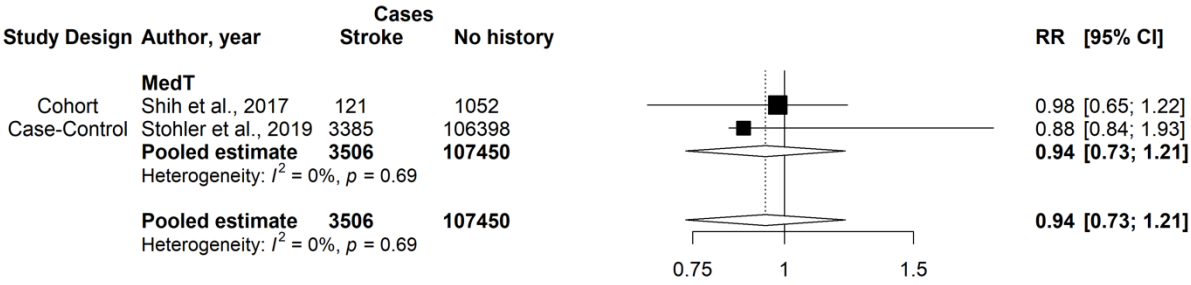

**Supplementary Figure 19. Endocrine and metabolic – hyperlipidemia**

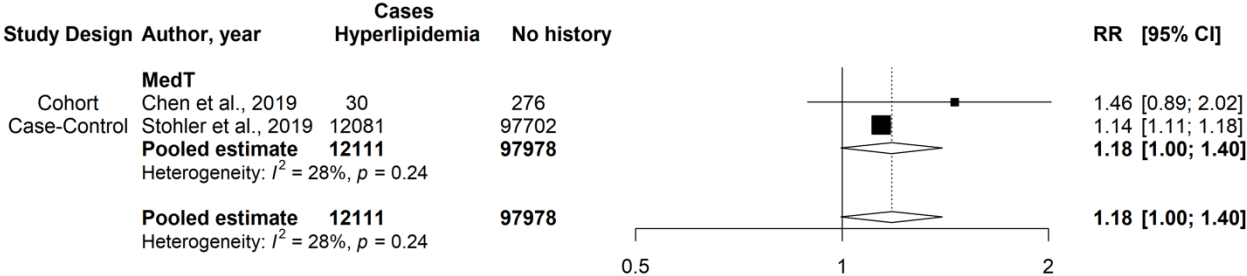

**Supplementary Figure 20. Immune-mediated – rheumatoid arthritis**

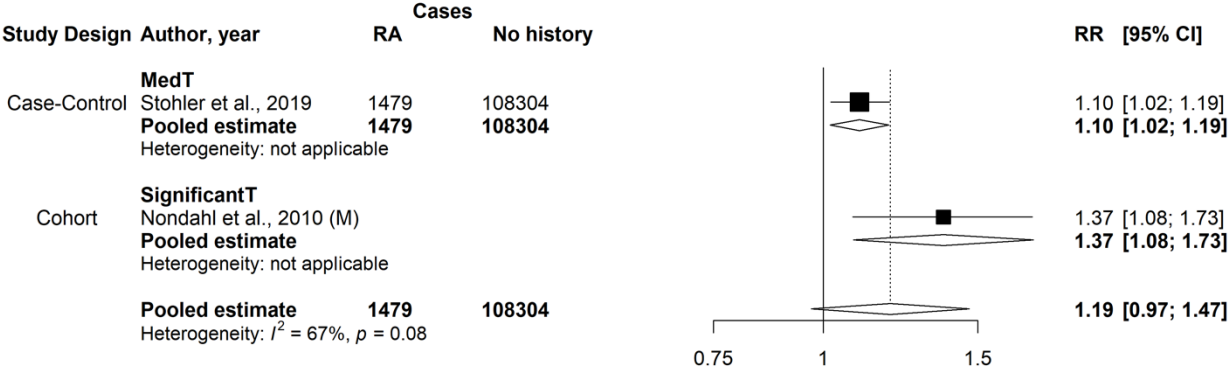

**Supplementary Figure 21. Neurological – migraine**

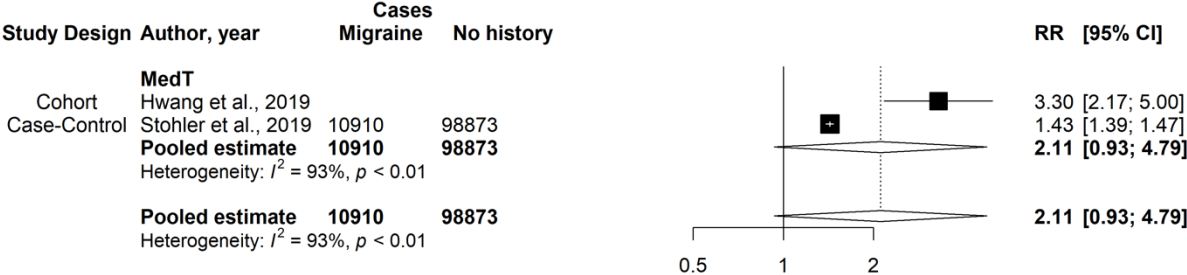

**Supplementary Figure 22. Respiratory – Chronic obstructive pulmonary disease**

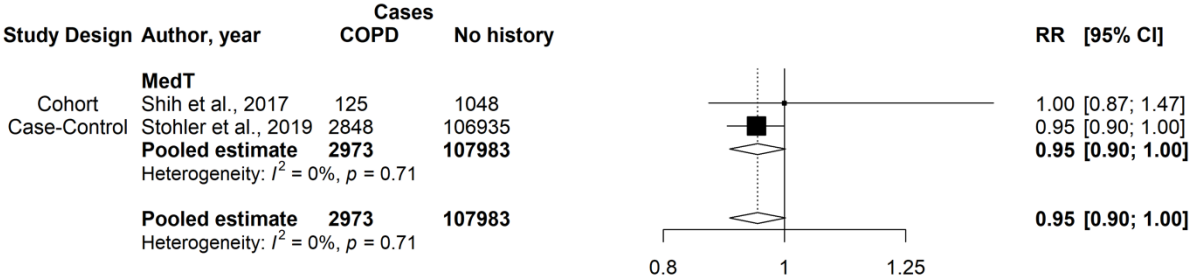

**Supplementary Figure 23. Traumatic head and neck injury – head injury**

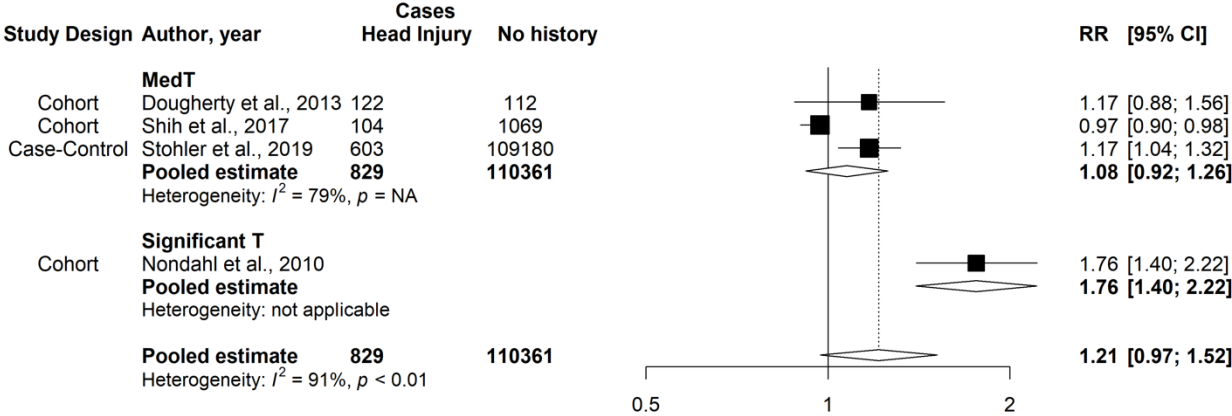

**Supplementary Figure 24. Traumatic head and neck injury – whiplash**

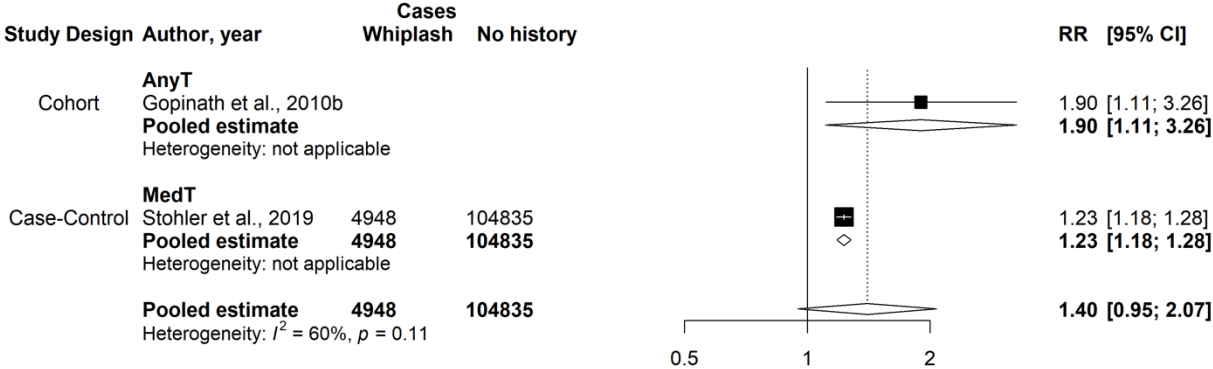

Supplement: 10162_2022_874_MOESM1_ESM.pdf [file 10162_2022_874_MOESM1_ESM.pdf]
